# Supplementary material
Source: publisher figshare collection journal article supplement (https://tandf.figshare.com/ndownloader/files/15519308)
Supplement: Supplementary file 1 [file 15519308]

## Supplementary materials: Emigration and Rising Wages in Myanmar: Evidence from Mon State

Figure S1: Distribution of the year migrants left (current and returned migrants)

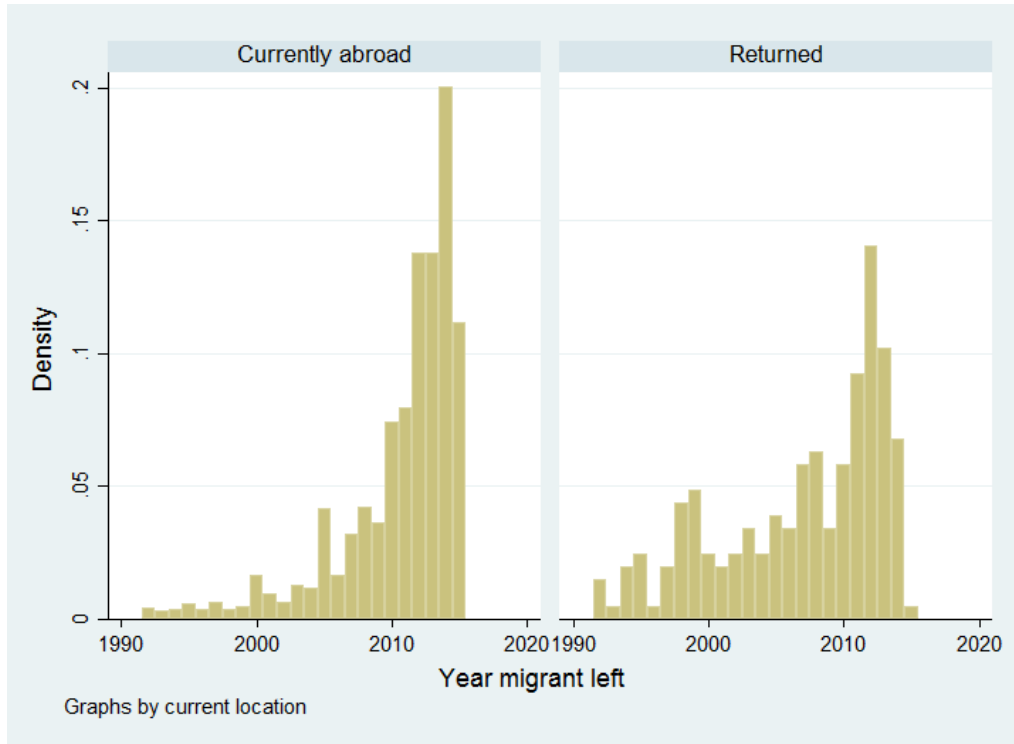

Figure S2: Population pyramid for all of Myanmar, 2010

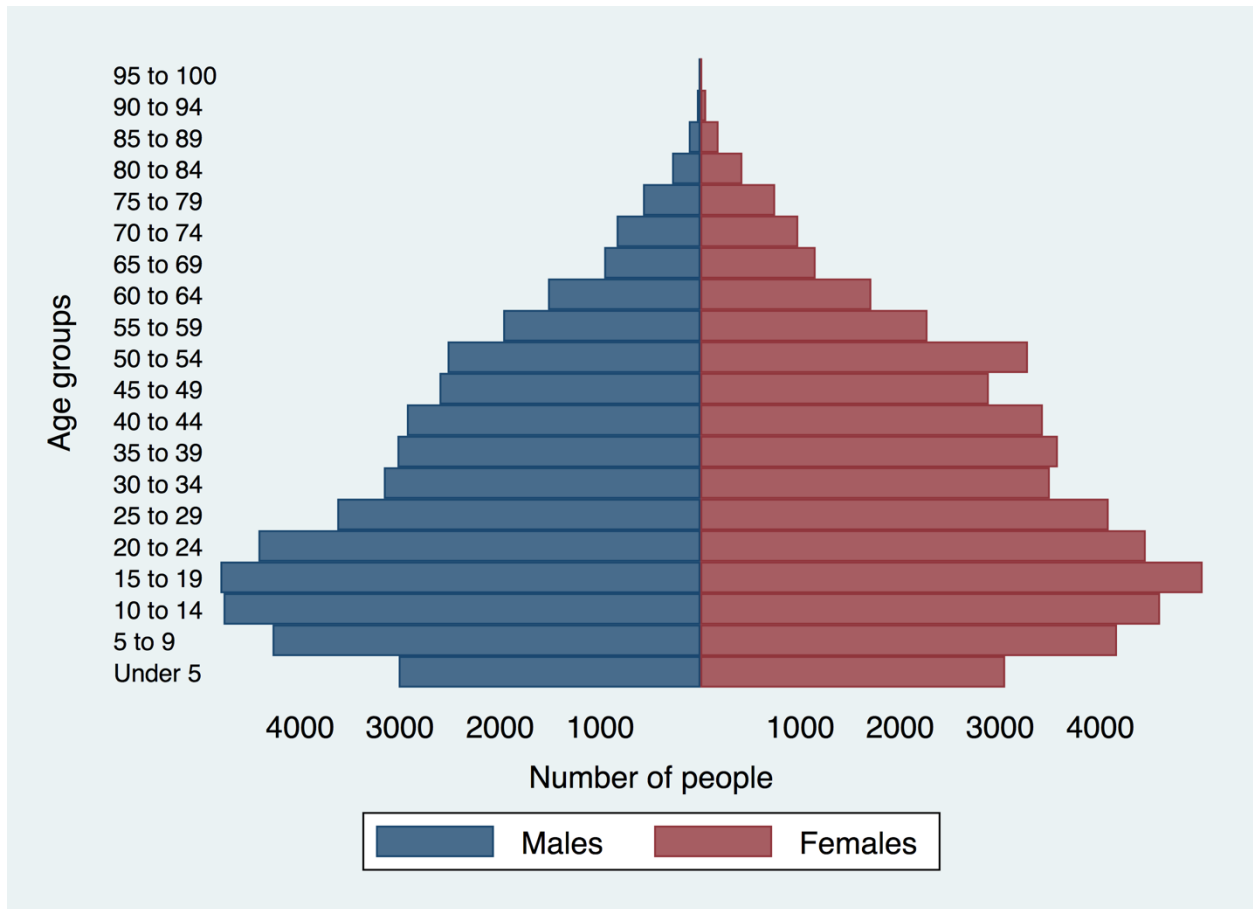

Source: 2010 ILHCA dataset, author calculations. Note: A similarly shaped pyramid is obtained when restricting the sample to rural areas only.

Table S1: Allocation of sample EAs and households for Rural Mon State Household Survey, by strata

| Stratum      | Predominant activity | Total      |                   | 1-Low substratum |                   | 2-High substratum |                   |
|--------------|----------------------|------------|-------------------|------------------|-------------------|-------------------|-------------------|
|              |                      | Sample EAs | Sample households | Sample EAs       | Sample households | Sample EAs        | Sample households |
| 1            | Marine fishing       | 35         | 420               | 18               | 216               | 17                | 204               |
| 2            | Orchards             | 35         | 420               | 12               | 144               | 23                | 276               |
| 3            | Rubber               | 35         | 420               | 4                | 48                | 31                | 372               |
| 4            | Rice                 | 35         | 420               | 3                | 36                | 32                | 384               |
| <b>Total</b> |                      | <b>140</b> | <b>1,680</b>      | <b>37</b>        | <b>444</b>        | <b>103</b>        | <b>1,236</b>      |

Table S2: Migration flows in South-East Asia, 2005-2010

|             | Population | In  | Out  | Net   |
|-------------|------------|-----|------|-------|
| Myanmar     |            | 0   | 498  | -499  |
| Thailand    |            | 508 | 15   | 493   |
| Vietnam     |            | 19  | 448  | -430  |
| Cambodia    |            |     |      |       |
| Lao         |            | 0   | 75   | -75   |
| Malaysia    |            | 696 | 610  | 85    |
| Singapore   |            | 721 |      | 721   |
| Philippines |            |     |      |       |
| Indonesia   |            | 0   | 1276 | -1277 |

Source: [http://www.global-migration.info/VID\\_Global\\_Migration\\_Datasheet\\_web.pdf](http://www.global-migration.info/VID_Global_Migration_Datasheet_web.pdf)

Also see: <http://www.global-migration.info/>

Table S3: Largest expenses made using remittances (% of responses)

|                                                  | All migrants | Males       | Females     |
|--------------------------------------------------|--------------|-------------|-------------|
| House construction                               | 26.4%        | 28.5%       | 24.1%       |
| Purchase agricultural land                       | 19.3%        | 14.6%       | 24.1%       |
| Pay medical expenses                             | 13.2%        | 11.4%       | 15.0%       |
| Purchase land for housing                        | 9.3%         | 11.4%       | 7.2%        |
| Donations to monasteries                         | 7.9%         | 9.2%        | 6.6%        |
| Purchase agricultural assets / fishing equipment | 6.4%         | 5.2%        | 7.7%        |
| Pay debts                                        | 5.8%         | 5.1%        | 6.5%        |
| Pay for ceremonies                               | 5.6%         | 5.7%        | 5.5%        |
| Purchase durable assets                          | 2.5%         | 3.6%        | 1.4%        |
| Other                                            | 3.7%         | 5.4%        | 1.9%        |
| <b>TOTAL</b>                                     | <b>100%</b>  | <b>100%</b> | <b>100%</b> |

Table S4: OLS regressions of wages on share of households with migrants and covariates

|                                                  | (1)                    | (2)                    | (3)                    | (4)                   | (5)                   | (6)                    |
|--------------------------------------------------|------------------------|------------------------|------------------------|-----------------------|-----------------------|------------------------|
|                                                  | Peak wage              | Peak wage              | Peak wage              | Slack wage            | Slack wage            | Slack wage             |
| Pct. of hh with international migrants           | 15.79***<br>(6.42)     | 13.79***<br>(5.01)     | 13.17***<br>(4.61)     | 11.58***<br>(4.04)    | 10.18**<br>(3.19)     | 8.879**<br>(3.00)      |
| Gender                                           | -1260.7***<br>(-11.83) | -1267.0***<br>(-11.96) | -1280.1***<br>(-12.12) | -1183.2***<br>(-9.66) | -1186.4***<br>(-9.67) | -1188.4***<br>(-10.88) |
| Distance to urban center (miles)                 | -7.660<br>(-1.24)      | -5.455<br>(-0.87)      | -7.531<br>(-1.13)      | -6.229<br>(-0.86)     | -6.528<br>(-0.88)     | -12.94<br>(-1.82)      |
| Public transport to urban center                 | -154.5<br>(-1.23)      | -271.5*<br>(-2.09)     | -228.8<br>(-1.60)      | 71.64<br>(0.49)       | 16.80<br>(0.11)       | 60.24<br>(0.40)        |
| Lowland                                          | -280.7<br>(-1.87)      | -301.8*<br>(-1.98)     | -353.6*<br>(-2.03)     | 234.6<br>(1.36)       | 207.2<br>(1.16)       | 33.25<br>(0.18)        |
| Upland                                           | -297.5*<br>(-2.05)     | -305.7*<br>(-2.04)     | -310.0<br>(-1.72)      | 3.290<br>(0.02)       | -38.91<br>(-0.22)     | -112.9<br>(-0.61)      |
| Publicly provided electricity within the village |                        | 260.0*<br>(2.12)       | 208.2<br>(1.60)        |                       | -36.13<br>(-0.25)     | -162.3<br>(-1.22)      |
| Infrastructure for processing                    |                        | 84.90<br>(0.59)        | 145.2<br>(0.98)        |                       | 375.8*<br>(2.32)      | 404.5**<br>(2.70)      |
| Pct. of hhs in community without ag land         |                        | -646.8**<br>(-2.89)    | -627.6**<br>(-2.66)    |                       | -405.6<br>(-1.55)     | -544.1*<br>(-2.25)     |
| Access to large farm equipment                   |                        | -24.26<br>(-0.14)      | 13.94<br>(0.08)        |                       | 87.00<br>(0.43)       | 102.0<br>(0.52)        |
| Access to mechanical services                    |                        | -70.26<br>(-0.43)      | -28.48<br>(-0.16)      |                       | -32.56<br>(-0.17)     | 301.6<br>(1.63)        |
| Constant                                         | 5646.5***<br>(22.98)   | 6056.5***<br>(19.73)   | 6030.7***<br>(18.53)   | 4889.6***<br>(17.28)  | 5135.4***<br>(14.21)  | 5315.7***<br>(15.65)   |
| Observations                                     | 245                    | 243                    | 241                    | 251                   | 249                   | 247                    |

Table S5: OLS regressions of wages on migrants-to-workforce ratio and covariates - weighted

|                                                  | (1)                    | (2)                    | (3)                    | (4)                   | (5)                   | (6)                    |
|--------------------------------------------------|------------------------|------------------------|------------------------|-----------------------|-----------------------|------------------------|
|                                                  | Peak wage              | Peak wage              | Peak wage              | Slack wage            | Slack wage            | Slack wage             |
| Migrants-to-workforce ratio                      | 11.67***<br>(6.79)     | 10.36***<br>(5.70)     | 10.21***<br>(5.36)     | 5.016*<br>(2.44)      | 4.191<br>(1.91)       | 5.028*<br>(2.41)       |
| Gender                                           | -1295.2***<br>(-12.70) | -1299.7***<br>(-12.95) | -1305.2***<br>(-13.02) | -1195.8***<br>(-9.91) | -1197.1***<br>(-9.94) | -1193.9***<br>(-11.02) |
| Distance to urban center (miles)                 | -7.703<br>(-1.39)      | -5.406<br>(-0.96)      | -8.121<br>(-1.33)      | -4.483<br>(-0.67)     | -5.007<br>(-0.73)     | -11.31<br>(-1.66)      |
| Public transport to urban center                 | -153.4<br>(-1.21)      | -282.0*<br>(-2.17)     | -263.9<br>(-1.89)      | -2.177<br>(-0.01)     | -70.43<br>(-0.45)     | -40.86<br>(-0.27)      |
| Lowland                                          | -77.07<br>(-0.49)      | -161.9<br>(-1.03)      | -217.3<br>(-1.21)      | 233.7<br>(1.29)       | 198.9<br>(1.05)       | -41.55<br>(-0.22)      |
| Upland                                           | -31.09<br>(-0.19)      | -71.68<br>(-0.45)      | -106.8<br>(-0.56)      | 7.327<br>(0.04)       | -43.31<br>(-0.22)     | -188.1<br>(-0.94)      |
| Publicly provided electricity within the village |                        | 314.2**<br>(2.69)      | 239.0<br>(1.90)        |                       | -24.11<br>(-0.17)     | -138.6<br>(-1.03)      |
| Infrastructure for processing                    |                        | 93.08<br>(0.68)        | 180.5<br>(1.27)        |                       | 307.3<br>(1.93)       | 358.1*<br>(2.37)       |
| Pct. of hhs in community without ag land         |                        | -676.7**<br>(-3.06)    | -674.9**<br>(-2.88)    |                       | -442.2<br>(-1.66)     | -490.3*<br>(-1.97)     |
| Access to large farm equipment                   |                        | 33.43<br>(0.20)        | 53.48<br>(0.30)        |                       | 189.5<br>(0.91)       | 201.2<br>(1.01)        |
| Access to mechanical services                    |                        | -8.185<br>(-0.05)      | 75.21<br>(0.44)        |                       | -14.68<br>(-0.08)     | 360.7<br>(1.90)        |
| Shock dummies                                    |                        |                        | Yes                    |                       |                       | Yes                    |
| Observations                                     | 245                    | 243                    | 241                    | 251                   | 249                   | 247                    |

Table S6: OLS Robustness checks – weighted

|                                                        | Peak Wage            | Slack Wage           |
|--------------------------------------------------------|----------------------|----------------------|
| Distance to nearest border crossing                    | -5.568***<br>(0.805) | -9.405***<br>(0.634) |
| Distance to nearest point on border                    | -2.271<br>(1.935)    | -10.45***<br>(1.658) |
| Migrants-to-workforce ratio                            | 11.05***<br>(2.152)  | 5.766***<br>(1.121)  |
| Pct. of hh with international migrants                 | 13.17***<br>(1.385)  | 8.879***<br>(1.241)  |
| Pct. of hh who receive remittances                     | 14.00***<br>(1.927)  | 9.421***<br>(1.247)  |
| Pct. of hh with migs incl shortterm and local          | 11.34***<br>(1.443)  | 6.453***<br>(1.152)  |
| Pct. of hh who had international migrant prior to 2000 | 32.23***<br>(5.401)  | 21.20***<br>(4.163)  |
| Pct. of hh who had international migrant prior to 2005 | 21.06***<br>(3.006)  | 11.42***<br>(2.413)  |
| Pct. of hh who had migs return more than 2 years ago   | 22.87***<br>(3.073)  | 16.38***<br>(4.277)  |
| Pct. of hh with migs that returned within 2 years      | 27.41***<br>(5.129)  | 47.15***<br>(3.706)  |
| Number of hhs in community with migrant member abroad  | 0.662***<br>(0.117)  | 0.621***<br>(0.0936) |
| Observations                                           | 241                  | 247                  |

Table S7: IV regression results under “plausibly exogenous” instruments assumption

| Instrumental variable (proxy for networks)       | (1)                                                | (2)                   | (3)                                                             | (4)                   | (5)                                                                    | (6)                   |      |
|--------------------------------------------------|----------------------------------------------------|-----------------------|-----------------------------------------------------------------|-----------------------|------------------------------------------------------------------------|-----------------------|------|
|                                                  | Share of households who had migrants prior to 2000 |                       | Share of households with migrants who returned over 2 years ago |                       | Share of households with migrants who returned within the past 2 years |                       |      |
|                                                  | Peak                                               | Slack                 | Peak                                                            | Slack                 | Peak                                                                   | Slack                 |      |
| $\delta$ (Deviation from exclusion restriction)  |                                                    | 19.9                  | 14.9                                                            | 15.0                  | 11.6                                                                   | 11.0                  | 41.0 |
| Migrants-to-workforce ratio                      | 22.56***<br>(5.353)                                | 14.77*<br>(5.765)     |                                                                 |                       |                                                                        |                       |      |
| Pct. of hh with international migrants           |                                                    |                       | 35.92***<br>(10.04)                                             | 25.52*<br>(11.93)     |                                                                        |                       |      |
| Pct. of hh who receive remittances               |                                                    |                       |                                                                 |                       | 21.87**<br>(8.081)                                                     | 42.22***<br>(10.73)   |      |
| Gender                                           | -1279.5***<br>(105.0)                              | -1189.0***<br>(107.6) | -1279.9***<br>(112.9)                                           | -1189.9***<br>(110.4) | -1275.3***<br>(101.1)                                                  | -1188.8***<br>(129.3) |      |
| Distance to urban center (miles)                 | -7.627<br>(7.192)                                  | -14.71*<br>(6.121)    | 1.660<br>(8.219)                                                | -8.560<br>(7.452)     | -8.317<br>(6.989)                                                      | -14.19<br>(9.320)     |      |
| Public transport to urban center                 | -182.3<br>(140.7)                                  | 65.16<br>(141.1)      | -62.32<br>(159.2)                                               | 147.4<br>(156.8)      | -154.7<br>(145.7)                                                      | 238.1<br>(186.0)      |      |
| Publicly provided electricity within the village | 129.4<br>(119.0)                                   | -221.8<br>(136.8)     | 142.7<br>(139.6)                                                | -189.6<br>(136.0)     | 245.5*<br>(123.0)                                                      | -176.4<br>(160.7)     |      |
| Infrastructure for processing                    | 249.2<br>(156.6)                                   | 492.5**<br>(150.1)    | 161.4<br>(168.9)                                                | 423.3**<br>(153.2)    | 198.9<br>(138.9)                                                       | 579.7**<br>(187.9)    |      |
| Pct. of hhs in community without ag land         | -236.8<br>(256.3)                                  | -286.1<br>(261.9)     | -163.9<br>(295.0)                                               | -215.6<br>(306.1)     | -645.6**<br>(225.3)                                                    | -178.4<br>(342.9)     |      |
| Access to large farm equipment                   | 7.696<br>(209.0)                                   | 51.10<br>(199.9)      | -148.8<br>(211.6)                                               | -36.48<br>(202.6)     | -45.30<br>(197.8)                                                      | -248.9<br>(264.5)     |      |
| Access to mechanical services                    | -203.0<br>(209.0)                                  | 314.0<br>(182.3)      | -343.0<br>(264.2)                                               | 149.0<br>(235.4)      | -170.1<br>(219.8)                                                      | 128.7<br>(222.6)      |      |
| Shock dummies                                    | Yes                                                | Yes                   | Yes                                                             | Yes                   | Yes                                                                    | Yes                   |      |
| Observations                                     | 241                                                | 247                   | 241                                                             | 247                   | 241                                                                    | 247                   |      |

Note:  $\delta$  is estimated from regressions of the outcome variable (wages) on the instrument, the endogenous variable, and all controls. Constant and shock variables not reported in interest of space. Shock dummies include: weather community experienced the following in the previous year: flooding, drought, cyclone, crop disease, fire, declining fish stocks, other natural disaster; or ever experienced erosion, soil salinization, declining fish stocks, conflict, control by a non-governmental armed group.

Table S8: IV regression with township-level migrant share as the instrument

| Instrumental variable (proxy for networks)                              | (1)                                                         | (2)        | (3)        | (4)        | (5)        | (6)        |
|-------------------------------------------------------------------------|-------------------------------------------------------------|------------|------------|------------|------------|------------|
|                                                                         | Township-level share of households who had migrants in 2005 |            |            |            |            |            |
|                                                                         | Peak                                                        | Slack      | Peak       | Slack      | Peak       | Slack      |
| <b>Endogenous variable:</b>                                             |                                                             |            |            |            |            |            |
| Migrants-to-workforce ratio                                             | 14.95*                                                      | 12.36      |            |            |            |            |
|                                                                         | (6.049)                                                     | (7.548)    |            |            |            |            |
| Pct. of hh with international migrants                                  |                                                             |            | 14.54*     | 11.67      |            |            |
|                                                                         |                                                             |            | (5.770)    | (7.201)    |            |            |
| Pct. of hh who receive remittances                                      |                                                             |            |            |            | 15.68*     | 12.83      |
|                                                                         |                                                             |            |            |            | (6.453)    | (7.754)    |
| <b>Controls:</b>                                                        |                                                             |            |            |            |            |            |
| Gender                                                                  | -1279.1***                                                  | -1188.8*** | -1279.0*** | -1188.6*** | -1276.2*** | -1187.9*** |
|                                                                         | (98.60)                                                     | (105.5)    | (99.45)    | (103.0)    | (99.43)    | (102.6)    |
| Distance to urban center (miles)                                        | -8.836                                                      | -14.91*    | -6.003     | -12.56*    | -9.137     | -15.40**   |
|                                                                         | (6.227)                                                     | (5.905)    | (6.075)    | (5.950)    | (6.294)    | (5.857)    |
| Public transport to urban center                                        | -210.1                                                      | 52.34      | -182.7     | 60.05      | -185.8     | 62.94      |
|                                                                         | (137.3)                                                     | (142.7)    | (144.3)    | (140.8)    | (146.1)    | (142.0)    |
| Publicly provided electricity within the village                        | 160.8                                                       | -206.9     | 190.2      | -157.5     | 239.0*     | -144.5     |
|                                                                         | (117.7)                                                     | (143.3)    | (119.7)    | (129.0)    | (117.9)    | (126.9)    |
| Infrastructure for processing                                           | 209.0                                                       | 476.7**    | 142.8      | 408.3**    | 179.4      | 451.5**    |
|                                                                         | (146.1)                                                     | (162.0)    | (130.7)    | (138.6)    | (134.1)    | (148.4)    |
| Pct. of hhs in community without ag land                                | -466.7                                                      | -356.5     | -613.3*    | -488.6     | -723.0**   | -554.4*    |
|                                                                         | (294.1)                                                     | (339.3)    | (255.9)    | (284.7)    | (238.2)    | (262.5)    |
| Access to large farm equipment                                          | 20.98                                                       | 77.16      | -32.21     | 97.85      | -19.15     | 71.27      |
|                                                                         | (188.9)                                                     | (215.2)    | (179.1)    | (202.5)    | (186.5)    | (208.7)    |
| Access to mechanical services                                           | -89.47                                                      | 324.6      | -59.25     | 273.8      | -84.14     | 302.9      |
|                                                                         | (190.4)                                                     | (168.8)    | (177.5)    | (165.5)    | (193.4)    | (160.6)    |
| Shock dummies                                                           | yes                                                         | yes        | yes        | yes        | yes        | yes        |
| Constant                                                                | 5814.3***                                                   | 5080.5***  | 6020.0***  | 5307.5***  | 6091.4***  | 5355.7***  |
|                                                                         | (488.9)                                                     | (622.9)    | (452.6)    | (521.3)    | (438.7)    | (489.7)    |
| Observations                                                            | 241                                                         | 247        | 241        | 247        | 241        | 247        |
| r2                                                                      | 0.517                                                       | 0.485      | 0.506      | 0.508      | 0.507      | 0.512      |
| F statistic for weak identification (Kleibergen-Paap)                   | 26.780                                                      | 20.305     | 44.986     | 38.092     | 46.307     | 38.160     |
| Anderson-Rubin chi-sq test of significance of endogenous regressors     | 0.020                                                       | 0.111      | 0.020      | 0.111      | 0.020      | 0.111      |
| LM test statistic for underidentification (Anderson or Kleibergen-Paap) | 18.545                                                      | 14.368     | 27.011     | 23.048     | 24.837     | 20.615     |



Table S9: Impacts of migration on agricultural practices – second-stage of IV

| Outcome                                                                | Coefficient on migrant dummy |
|------------------------------------------------------------------------|------------------------------|
| <u>Agriculture - Rice</u>                                              |                              |
| Household hired workers (locals or migrants) for rice production       | -0.461***                    |
| Household uses animals for land preparation in rice production         | -0.440***                    |
| Household uses machinery for farm to barn transport in rice production | 0.423***                     |
| <u>Agriculture - Rubber</u>                                            |                              |
| Household owns rubber trees                                            | 0.430***                     |
| Household used urea fertiliser for rubber production                   | 0.353***                     |
| Household hired workers for rubber production                          | -0.446***                    |
| <u>Other</u>                                                           |                              |
| Household engages in resource extraction                               | -0.164**                     |
| Household owns land motorised transportation asset                     | 0.485***                     |

Source: Author calculation. All specifications include a constant and the following controls at the household level: household head characteristics (age, gender education, local birth), whether household experienced a natural disaster, death, major health event, income disruption, conflict, land loss, price shocks; and at the community level: distance to urban center, agro-processing infrastructure, access to large farm equipment, access to mechanised services, flooding in past year, declining fish stocks, violent conflict, armed group control, and agro-ecological zone
